# Supplementary material
Source: PubMed Central journal article supplement (PMC6399499)
Supplement: 10.1194_M090464_jlr.M090464-1.pdf [file 10.1194_M090464_jlr.M090464-1.pdf]

## **Supplemental Information**

### **Dietary lysophosphatidylcholine-EPA enriches both EPA and DHA in the brain: Potential treatment for depression**

Poorna CR Yalagala<sup>1¶</sup>, Dhavamani Sugasini<sup>1¶</sup>, Sridevi Dasarathi<sup>2</sup>, Kalipada Pahan<sup>2</sup>, and  
Papasani V. Subbaiah<sup>1\*</sup>

<sup>1</sup>Department of Medicine, University of Illinois at Chicago; <sup>2</sup>Department of Neurology, Rush  
University, Chicago

Chicago, IL 60612

**Supplemental Table S1: Plasma fatty acid composition (% of total, mean  $\pm$  SD, n=6 per group)**

| Fatty acid                           | Control          | Free- EPA            | LPC-EPA                  |
|--------------------------------------|------------------|----------------------|--------------------------|
| 14:0                                 | 1.23 $\pm$ 0.09  | 1.18 $\pm$ 0.03      | 1.27 $\pm$ 0.04          |
| 16:0                                 | 23.83 $\pm$ 1.51 | 23.81 $\pm$ 0.79     | 25.08 $\pm$ 0.26         |
| 16:1(n-7)                            | 2.17 $\pm$ 0.65  | 1.26 $\pm$ 0.07**    | 1.35 $\pm$ 0.03**        |
| 18:0                                 | 7.44 $\pm$ 0.73  | 7.47 $\pm$ 0.22      | 8.03 $\pm$ 0.06          |
| 18:1 (n-9)                           | 18.91 $\pm$ 1.11 | 16.05 $\pm$ 0.55**** | 17.07 $\pm$ 0.16**       |
| 18:1 (n-7)                           | 2.23 $\pm$ 0.34  | 1.73 $\pm$ 0.05**    | 1.87 $\pm$ 0.03*         |
| 18:2 (n-6)                           | 26.69 $\pm$ 0.82 | 25.07 $\pm$ 0.85**   | 26.74 $\pm$ 0.17 ##      |
| 18:3 (n-6)                           | 0.04 $\pm$ 0.02  | 0.03 $\pm$ 0.02      | 0.03 $\pm$ 0.01          |
| 18:3 (n-3)                           | 0.67 $\pm$ 0.22  | 1.22 $\pm$ 0.04***   | 1.28 $\pm$ 0.07***       |
| 20:0                                 | 0.24 $\pm$ 0.04  | 0.19 $\pm$ 0.09      | 1.36 $\pm$ 0.09          |
| 20:1 (n-9)                           | 0.44 $\pm$ 0.10  | 0.47 $\pm$ 0.12      | 0.37 $\pm$ 0.03          |
| 20:2 (n-6)                           | 0.52 $\pm$ 0.08  | 0.42 $\pm$ 0.06      | 0.56 $\pm$ 0.05          |
| 20:3 (n-6)                           | 0.27 $\pm$ 0.19  | 0.13 $\pm$ 0.17      | 0.33 $\pm$ 0.15          |
| 20:4 (n-6)                           | 8.89 $\pm$ 0.95  | 4.32 $\pm$ 0.16****  | 4.60 $\pm$ 0.04****      |
| 20:5 (n-3)                           | 0.15 $\pm$ 0.11  | 4.27 $\pm$ 0.27****  | 3.92 $\pm$ 0.37****      |
| 22:4 (n-6)                           | 1.67 $\pm$ 0.21  | 1.48 $\pm$ 0.09      | 1.60 $\pm$ 0.04          |
| 22:5 (n-3)                           | 0.53 $\pm$ 0.08  | 1.06 $\pm$ 0.06****  | 0.86 $\pm$ 0.11**** ##   |
| 22:6 (n-3)                           | 2.65 $\pm$ 0.33  | 8.39 $\pm$ 0.31****  | 4.53 $\pm$ 0.18**** #### |
| 16:0 DMA                             | 0.05 $\pm$ 0.04  | 0.02 $\pm$ 0.01      | 0.07 $\pm$ 0.09          |
| 18:0 DMA                             | 0.23 $\pm$ 0.02  | 1.19 $\pm$ 2.86      | 0.03 $\pm$ 0.01          |
| 18:1 DMA                             | 0.04 $\pm$ 0.01  | 0.04 $\pm$ 0.02      | 0.08 $\pm$ 0.03          |
| Total omega 3 FA<br>(20:5+22:5+22:6) | 3.33 $\pm$ 0.18  | 13.72 $\pm$ 0.21**** | 0.07 $\pm$ 0.22**** #### |

DMA: dimethylacetal

\*P < 0.05, \*\*p < 0.01; \*\*\*p < 0.001; \*\*\*\*p < 0.0001 compared to control (ANOVA)  
 # p < 0.05; ## p < 0.01; ### p < 0.001; #### p < 0.0001, compared to free EPA (ANOVA)

**Supplemental Table S2: Brain fatty acid composition (% of total, mean  $\pm$  SD, n=6 per group)**

| <b>Fatty acid</b>                    | <b>Control</b>   | <b>Free- EPA</b>     | <b>LPC-EPA</b>            |
|--------------------------------------|------------------|----------------------|---------------------------|
| 14:0                                 | 0.28 $\pm$ 0.12  | 0.22 $\pm$ 0.14      | 0.40 $\pm$ 0.19           |
| 16:0                                 | 24.32 $\pm$ 0.44 | 24.79 $\pm$ 0.22     | 20.58 $\pm$ 0.21**** #### |
| 16:1(n-7)                            | 0.54 $\pm$ 0.01  | 0.58 $\pm$ 0.02      | 0.49 $\pm$ 0.03           |
| 18:0                                 | 19.16 $\pm$ 0.15 | 19.38 $\pm$ 0.10     | 16.54 $\pm$ 0.21**** #### |
| 18:1 (n-9)                           | 16.97 $\pm$ 0.17 | 17.10 $\pm$ 0.22     | 15.31 $\pm$ 0.44**** #### |
| 18:1 (n-7)                           | 3.91 $\pm$ 0.13  | 4.09 $\pm$ 0.07*     | 3.40 $\pm$ 0.14**** ####  |
| 18:2 (n-6)                           | 0.81 $\pm$ 0.03  | 0.82 $\pm$ 0.04      | 0.67 $\pm$ 0.05**** ####  |
| 18:3 (n-6)                           | 0.02 $\pm$ 0.01  | 0.03 $\pm$ 0.02      | 0.03 $\pm$ 0.03           |
| 18:3 (n-3)                           | 0.12 $\pm$ 0.06  | 0.17 $\pm$ 0.04      | 0.13 $\pm$ 0.07           |
| 20:0                                 | 0.25 $\pm$ 0.10  | 0.27 $\pm$ 0.11      | 0.26 $\pm$ 0.10           |
| 20:1 (n-9)                           | 2.05 $\pm$ 0.04  | 2.16 $\pm$ 0.04      | 2.01 $\pm$ 0.19           |
| 20:2 (n-6)                           | 0.44 $\pm$ 0.02  | 0.34 $\pm$ 0.12      | 0.38 $\pm$ 0.18           |
| 20:3 (n-6)                           | 0.40 $\pm$ 0.05  | 0.36 $\pm$ 0.06      | 0.31 $\pm$ 0.04           |
| 20:4 (n-6)                           | 11.31 $\pm$ 0.22 | 10.06 $\pm$ 0.12**** | 6.70 $\pm$ 0.16**** ####  |
| 20:5 (n-3)                           | 0.04 $\pm$ 0.02  | 0.56 $\pm$ 0.19**    | 4.14 $\pm$ 0.30**** ####  |
| 22:4 (n-6)                           | 2.36 $\pm$ 0.06  | 2.39 $\pm$ 0.04      | 2.14 $\pm$ 0.12           |
| 22:5 (n-6)                           | 0.81 $\pm$ 0.12  | 0.51 $\pm$ 0.05****  | 0.11 $\pm$ 0.05**** ####  |
| 22:5 (n-3)                           | 0.09 $\pm$ 0.07  | 0.16 $\pm$ 0.11      | 1.17 $\pm$ 0.19**** ####  |
| 22:6 (n-3)                           | 11.57 $\pm$ 0.18 | 11.93 $\pm$ 0.13     | 21.10 $\pm$ 1.24**** #### |
| 16:0 DMA                             | 1.53 $\pm$ 0.11  | 1.39 $\pm$ 0.10      | 1.53 $\pm$ 0.16           |
| 18:0 DMA                             | 2.61 $\pm$ 0.21  | 2.26 $\pm$ 0.21      | 2.28 $\pm$ 0.24           |
| 18:1 DMA                             | 0.02 $\pm$ 0.01  | 0.03 $\pm$ 0.02      | 0.04 $\pm$ 0.04           |
| Total omega 3 FA<br>(20:5+22:5+22:6) | 11.70 $\pm$ 0.21 | 12.65 $\pm$ 0.34**** | 26.42 $\pm$ 1.18**** #### |

DMA: dimethylacetal

\*P< 0.05, \*\*p<0.01; \*\*\*p<0.001; \*\*\*\*p<0.0001 compared to control (ANOVA)

# p<0.05; ## p<0.01; ### p<0.001; #### p<0.0001, compared to free EPA (ANOVA)

**Supplemental Table S3: Liver fatty acid composition (% of total; mean  $\pm$  SD; n=6 per group)**

| Fatty acid                           | Control          | Free- EPA            | LPC-EPA                     |
|--------------------------------------|------------------|----------------------|-----------------------------|
| 14:0                                 | 0.50 $\pm$ 0.05  | 0.19 $\pm$ 0.20      | 0.08 $\pm$ 0.05             |
| 16:0                                 | 21.67 $\pm$ 1.26 | 23.45 $\pm$ 0.36 **  | 22.23 $\pm$ 0.30 #          |
| 16:1(n-7)                            | 2.43 $\pm$ 0.64  | 3.11 $\pm$ 0.19 *    | 2.56 $\pm$ 0.11             |
| 18:0                                 | 3.64 $\pm$ 0.78  | 4.65 $\pm$ 0.15 **   | 4.36 $\pm$ 0.14 *           |
| 18:1 (n-9)                           | 20.64 $\pm$ 2.45 | 24.09 $\pm$ 0.22 **  | 21.03 $\pm$ 0.22 ##         |
| 18:1 (n-7)                           | 2.03 $\pm$ 1.23  | 3.42 $\pm$ 0.13 *    | 2.87 $\pm$ 0.15             |
| 18:2 (n-6)                           | 27.29 $\pm$ 4.15 | 23.39 $\pm$ 0.58 *   | 22.48 $\pm$ 0.97 *          |
| 18:3 (n-6)                           | 0.29 $\pm$ 0.30  | 0.13 $\pm$ 0.15      | 0.20 $\pm$ 0.19             |
| 18:3 (n-3)                           | 2.61 $\pm$ 2.29  | 0.28 $\pm$ 0.33 *    | 0.29 $\pm$ 0.12 *           |
| 20:0                                 | 0.20 $\pm$ 0.07  | 0.39 $\pm$ 0.16      | 0.31 $\pm$ 0.15             |
| 20:1 (n-9)                           | 0.56 $\pm$ 0.36  | 1.05 $\pm$ 0.25 *    | 0.86 $\pm$ 0.19             |
| 20:2 (n-6)                           | 0.55 $\pm$ 0.15  | 0.49 $\pm$ 0.35      | 0.47 $\pm$ 0.09             |
| 20:3 (n-6)                           | 1.06 $\pm$ 0.11  | 1.04 $\pm$ 0.48      | 1.21 $\pm$ 0.22             |
| 20:4 (n-6)                           | 12.67 $\pm$ 1.28 | 4.04 $\pm$ 0.17 **** | 4.96 $\pm$ 0.26 ****        |
| 20:5 (n-3)                           | 0.17 $\pm$ 0.17  | 2.85 $\pm$ 0.49 **** | 5.65 $\pm$ 0.43 **** #####  |
| 22:4 (n-6)                           | 0.35 $\pm$ 0.09  | 4.64 $\pm$ 0.20      | 0.44 $\pm$ 0.08             |
| 22:5 (n-3)                           | 2.69 $\pm$ 0.09  | 2.13 $\pm$ 0.54 **** | 3.64 $\pm$ 0.15 **** #####  |
| 22:6 (n-3)                           | 2.74 $\pm$ 0.45  | 3.70 $\pm$ 0.24 ***  | 5.50 $\pm$ 0.19 **** #####  |
| 16:0 DMA                             | 0.02 $\pm$ 0.01  | 0.11 $\pm$ 0.09      | 0.05 $\pm$ 0.04             |
| 18:0 DMA                             | 0.08 $\pm$ 0.08  | 0.07 $\pm$ 0.06      | 0.08 $\pm$ 0.06             |
| 18:1 DMA                             | 0.05 $\pm$ 0.03  | 0.10 $\pm$ 0.07      | 0.11 $\pm$ 0.08             |
| Total omega 3 FA<br>(20:5+22:5+22:6) | 3.60 $\pm$ 0.53  | 8.68 $\pm$ 0.91***   | 14.78 $\pm$ 0.66 **** ##### |

DMA: dimethylacetal

\*P< 0.05, \*\*p<0.01; \*\*\*p<0.001; \*\*\*\*p<0.0001 compared to control (ANOVA)

# p<0.05; ## p<0.01; ### p<0.001; ##### p<0.0001, compared to free EPA (ANOVA)

**Supplemental Table S4: Fatty acid composition in heart lipids (% of total; mean  $\pm$ SD; n=6 per group)**

| Fatty acid                           | Control          | Free EPA              | LPC-EPA               |
|--------------------------------------|------------------|-----------------------|-----------------------|
| 14:0                                 | 1.18 $\pm$ 0.19  | 1.11 $\pm$ 0.10       | 1.13 $\pm$ 0.06       |
| 16:0                                 | 22.44 $\pm$ 1.96 | 16.56 $\pm$ 0.27 **** | 16.39 $\pm$ 0.23 **** |
| 16:1(n-7)                            | 2.64 $\pm$ 0.90  | 4.11 $\pm$ 0.14 ***   | 4.19 $\pm$ 0.09 ***   |
| 18:0                                 | 7.46 $\pm$ 1.29  | 3.94 $\pm$ 0.24 ****  | 3.98 $\pm$ 0.12 ****  |
| 18:1 (n-9)                           | 19.33 $\pm$ 1.57 | 20.36 $\pm$ 0.18      | 20.24 $\pm$ 0.20      |
| 18:1(n-7)                            | 2.49 $\pm$ 0.42  | 3.55 $\pm$ 0.25 ****  | 3.66 $\pm$ 0.09 ****  |
| 18:2 (n-6)                           | 24.68 $\pm$ 2.23 | 27.35 $\pm$ 0.34 **   | 26.94 $\pm$ 0.35 *    |
| 18:3 (n-6)                           | 0.25 $\pm$ 0.05  | 0.19 $\pm$ 0.01       | 0.19 $\pm$ 0.01       |
| 18:3 (n-3)                           | 1.73 $\pm$ 0.61  | 3.73 $\pm$ 0.27 ****  | 3.73 $\pm$ 0.11 ****  |
| 20:0                                 | 0.40 $\pm$ 0.02  | 0.08 $\pm$ 0.01       | 0.08 $\pm$ 0.00       |
| 20:1 (n-9)                           | 0.51 $\pm$ 0.09  | 0.45 $\pm$ 0.09       | 0.37 $\pm$ 0.03       |
| 20:2 (n-6)                           | 0.12 $\pm$ 0.07  | 0.29 $\pm$ 0.25       | 0.54 $\pm$ 0.05       |
| 20:3 (n-6)                           | 0.40 $\pm$ 0.10  | 0.23 $\pm$ 0.04 ***   | 0.23 $\pm$ 0.03 **    |
| 20:4 (n-6)                           | 8.87 $\pm$ 1.24  | 4.59 $\pm$ 0.25 ****  | 4.75 $\pm$ 0.32 ****  |
| 22:0                                 | 0.03 $\pm$ 0.03  | 0.01 $\pm$ 0.00       | 0.01 $\pm$ 0.01       |
| 20:5 (n-3)                           | 0.085 $\pm$ 0.08 | 4.90 $\pm$ 0.70 ****  | 4.95 $\pm$ 0.52 ****  |
| 22:0                                 | 0.07 $\pm$ 0.05  | 0.01 $\pm$ 0.01       | 0.01 $\pm$ 0.01       |
| 22:4 (n-6)                           | 1.92 $\pm$ 0.81  | 0.35 $\pm$ 0.05 ***   | 0.37 $\pm$ 0.03 ***   |
| 22:5(n-3)                            | 0.553 $\pm$ 0.23 | 0.96 $\pm$ 0.21       | 0.93 $\pm$ 0.15       |
| 22:6 (n-3)                           | 4.667 $\pm$ 0.49 | 7.14 $\pm$ 0.72 ****  | 7.23 $\pm$ 0.29 ****  |
| 24:1 (n-9)                           | 0.05 $\pm$ 0.03  | 0.02 $\pm$ 0.01       | 0.02 $\pm$ 0.01       |
| Total omega 3 FA<br>(20:5+22:5+22:6) | 5.30 $\pm$ 0.67  | 13.00 $\pm$ 1.53 **** | 13.11 $\pm$ 0.86 **** |

\*P< 0.05, \*\*p<0.01; \*\*\*p<0.001; \*\*\*\*p<0.0001 compared to control (ANOVA)

Note: There were no significant differences between free EPA and LPC-EPA

**Supplemental Table S5: Adipose tissue (peri-gonadal) fatty acid composition (% of total; mean  $\pm$  SD, n=6 per group)**

| Fatty acid                           | Control          | Free- EPA                        | LPC-EPA                          |
|--------------------------------------|------------------|----------------------------------|----------------------------------|
| 14:0                                 | 1.02 $\pm$ 0.08  | 1.17 $\pm$ 0.11                  | 1.11 $\pm$ 0.11                  |
| 16:0                                 | 19.69 $\pm$ 0.27 | 19.04 $\pm$ 0.30                 | 19.42 $\pm$ 0.16                 |
| 16:1(n-7)                            | 4.10 $\pm$ 0.21  | 4.05 $\pm$ 0.58                  | 3.70 $\pm$ 0.65                  |
| 18:0                                 | 4.01 $\pm$ 0.10  | 4.13 $\pm$ 0.29                  | 4.40 $\pm$ 0.27 <sup>#</sup>     |
| 18:1 (n-9)                           | 24.87 $\pm$ 0.25 | 23.76 $\pm$ 0.34 <sup>****</sup> | 24.37 $\pm$ 0.06 <sup>* ##</sup> |
| 18:1 (n-7)                           | 3.54 $\pm$ 0.10  | 3.17 $\pm$ 0.15 <sup>*</sup>     | 3.72 $\pm$ 0.32 <sup>##</sup>    |
| 18:2 (n-6)                           | 34.18 $\pm$ 0.36 | 33.25 $\pm$ 0.76                 | 34.54 $\pm$ 1.15 <sup>#</sup>    |
| 18:3 (n-6)                           | 0.19 $\pm$ 0.01  | 0.17 $\pm$ 0.01                  | 0.20 $\pm$ 0.13                  |
| 18:3 (n-3)                           | 3.63 $\pm$ 0.25  | 3.83 $\pm$ 0.28                  | 4.21 $\pm$ 0.36                  |
| 20:0                                 | 0.09 $\pm$ 0.01  | 0.08 $\pm$ 0.02                  | 0.14 $\pm$ 0.12                  |
| 20:1 (n-9)                           | 0.38 $\pm$ 0.03  | 0.36 $\pm$ 0.03                  | 0.44 $\pm$ 0.07                  |
| 20:2 (n-6)                           | 0.62 $\pm$ 0.07  | 0.32 $\pm$ 0.01                  | 0.29 $\pm$ 0.10                  |
| 20:3 (n-6)                           | 0.26 $\pm$ 0.06  | 0.19 $\pm$ 0.03                  | 0.27 $\pm$ 0.02                  |
| 20:4 (n-6)                           | 1.71 $\pm$ 0.17  | 1.28 $\pm$ 0.13 <sup>*</sup>     | 1.48 $\pm$ 0.32                  |
| 20:5 (n-3)                           | 0.12 $\pm$ 0.13  | 3.70 $\pm$ 0.43 <sup>****</sup>  | 0.15 $\pm$ 0.08 <sup>####</sup>  |
| 22:4 (n-6)                           | 0.38 $\pm$ 0.06  | 0.30 $\pm$ 0.14                  | 0.41 $\pm$ 0.05                  |
| 22:5 (n-3)                           | 0.33 $\pm$ 0.06  | 0.25 $\pm$ 0.05                  | 0.31 $\pm$ 0.06                  |
| 22:6 (n-3)                           | 0.62 $\pm$ 0.09  | 0.71 $\pm$ 0.27                  | 0.62 $\pm$ 0.16                  |
| 16:0 DMA                             | 0.02 $\pm$ 0.01  | 0.12 $\pm$ 0.01                  | 0.03 $\pm$ 0.02                  |
| 18:0 DMA                             | 0.05 $\pm$ 0.04  | 0.03 $\pm$ 0.02                  | 0.02 $\pm$ 0.02                  |
| 18:1 DMA                             | 0.04 $\pm$ 0.03  | 0.03 $\pm$ 0.01                  | 0.03 $\pm$ 0.02                  |
| Total omega 3 FA<br>(20:5+22:5+22:6) | 1.07 $\pm$ 0.06  | 4.66 $\pm$ 0.25 <sup>****</sup>  | 1.08 $\pm$ 0.10 <sup>####</sup>  |

DMA: dimethylacetal

\*P< 0.05, \*\*p<0.01; \*\*\*p<0.001; \*\*\*\*p<0.0001 compared to control (ANOVA)  
# p<0.05; ## p<0.01; ### p<0.001; #### p<0.0001, compared to free EPA (ANOVA)

**Supplemental Table S6: Erythrocytes fatty acid composition (% of total; mean  $\pm$  SD; n=6 per group)**

| Fatty acid                           | Control          | Free- EPA            | LPC-EPA                   |
|--------------------------------------|------------------|----------------------|---------------------------|
| 14:0                                 | 2.71 $\pm$ 0.13  | 1.46 $\pm$ 0.03****  | 1.36 $\pm$ 0.05****       |
| 16:0                                 | 33.16 $\pm$ 0.65 | 28.91 $\pm$ 0.43**** | 28.50 $\pm$ 0.88****      |
| 16:1(n-7)                            | 1.53 $\pm$ 0.03  | 1.22 $\pm$ 0.03****  | 1.88 $\pm$ 0.11**** ####  |
| 18:0                                 | 13.95 $\pm$ 0.69 | 10.88 $\pm$ 0.32**** | 9.28 $\pm$ 0.45**** ###   |
| 18:1 (n-9)                           | 13.53 $\pm$ 0.47 | 14.17 $\pm$ 0.22**   | 17.76 $\pm$ 0.22**** #### |
| 18:1 (n-7)                           | 2.72 $\pm$ 0.17  | 2.30 $\pm$ 0.13**    | 2.42 $\pm$ 0.30           |
| 18:2 (n-6)                           | 7.11 $\pm$ 0.72  | 12.30 $\pm$ 0.41**** | 20.34 $\pm$ 0.91**** #### |
| 18:3 (n-6)                           | 0.11 $\pm$ 0.06  | 0.11 $\pm$ 0.04      | 0.08 $\pm$ 0.04           |
| 18:3 (n-3)                           | 0.20 $\pm$ 0.11  | 0.62 $\pm$ 0.05****  | 1.22 $\pm$ 0.08**** ####  |
| 20:0                                 | 0.24 $\pm$ 0.05  | 0.22 $\pm$ 0.07      | 0.18 $\pm$ 0.04           |
| 20:1 (n-9)                           | 1.04 $\pm$ 0.14  | 0.76 $\pm$ 0.07      | 0.58 $\pm$ 0.23           |
| 20:2 (n-6)                           | 0.45 $\pm$ 0.06  | 0.40 $\pm$ 0.04      | 0.37 $\pm$ 0.11           |
| 20:3 (n-6)                           | 0.50 $\pm$ 0.12  | 0.43 $\pm$ 0.04      | 0.41 $\pm$ 0.05           |
| 20:4 (n-6)                           | 12.37 $\pm$ 0.55 | 7.80 $\pm$ 0.10****  | 6.73 $\pm$ 0.20**** ###   |
| 20:5 (n-3)                           | 0.16 $\pm$ 0.12  | 8.60 $\pm$ 0.90****  | 0.86 $\pm$ 0.19 ####      |
| 22:4 (n-6)                           | 3.06 $\pm$ 0.09  | 2.36 $\pm$ 0.07      | 2.03 $\pm$ 0.12           |
| 22:5 (n-3)                           | 0.73 $\pm$ 0.06  | 0.82 $\pm$ 0.07      | 0.56 $\pm$ 0.12           |
| 22:5 (n-6)                           | 0.82 $\pm$ 0.13  | 0.11 $\pm$ 0.08      | 0.10 $\pm$ 0.06** ###     |
| 22:6 (n-3)                           | 4.29 $\pm$ 0.63  | 5.95 $\pm$ 0.36**    | 4.79 $\pm$ 0.90 #         |
| 16:0 DMA                             | 0.63 $\pm$ 0.05  | 0.16 $\pm$ 0.04      | 0.08 $\pm$ 0.03           |
| 18:0 DMA                             | 0.29 $\pm$ 0.02  | 0.07 $\pm$ 0.04      | 0.05 $\pm$ 0.04           |
| 18:1 DMA                             | 0.09 $\pm$ 0.13  | 0.03 $\pm$ 0.02      | 0.08 $\pm$ 0.08           |
| Total omega 3 FA<br>(20:5+22:5+22:6) | 5.28 $\pm$ 0.29  | 14.66 $\pm$ 0.45**** | 5.75 $\pm$ 0.38####       |

DMA: dimethylacetal

\*P< 0.05, \*\*p<0.01; \*\*\*p<0.001; \*\*\*\*p<0.0001 compared to control (ANOVA)

# p<0.05; ## p<0.01; ### p<0.001; #### p<0.0001, compared to free EPA (ANOVA)

**Supplemental Table S7. Retina FA composition**

|                | <b>Control</b> | <b>Free EPA</b> | <b>LPC-EPA</b>      |
|----------------|----------------|-----------------|---------------------|
| 14:0           | 0.15 ± 0.05    | 0.17 ± 0.03     | 0.18 ± 0.08         |
| 16:0           | 18.83 ± 2.49   | 19.72 ± 1.25    | 14.89 ± 0.71* ###   |
| 16:1(n-7)      | 0.35 ± 0.13    | 0.46 ± 0.05     | 0.45 ± 0.03         |
| 18:0           | 18.45 ± 2.39   | 18.88 ± 1.45    | 14.58 ± 1.18* #     |
| 18:1 (n-9)     | 15.93 ± 3.15   | 16.77 ± 2.26    | 14.13 ± 2.12        |
| 18:1(n-7)      | 3.38 ± 0.51    | 3.90 ± 0.64     | 3.19 ± 0.44         |
| 18:2 (n-6)     | 0.69 ± 0.06    | 0.83 ± 0.10     | 0.62 ± 0.05         |
| 18:3 (n-6)     | 0.07 ± 0.05    | 0.05 ± 0.01     | 0.11 ± 0.04         |
| 18:3 (n-3)     | 0.06 ± 0.05    | 0.05 ± 0.01     | 0.06 ± 0.03         |
| 20:0           | 0.38 ± 0.15    | 0.39 ± 0.05     | 0.38 ± 0.11         |
| 20:1 (n-9)     | 1.60 ± 0.71    | 1.99 ± 0.80     | 2.33 ± 0.72         |
| 20:2 (n-6)     | 0.19 ± 0.09    | 0.15 ± 0.10     | 0.21 ± 0.08         |
| 20:3 (n-6)     | 0.41 ± 0.06    | 0.33 ± 0.04     | 0.32 ± 0.06         |
| 20:4 (n-6)     | 11.80 ± 1.09   | 10.20 ± 1.55    | 5.65 ± 0.45*** ##   |
| 20:5 (n-3)     | 0.14 ± 0.14    | 0.46 ± 0.28     | 5.07 ± 0.98*** ###  |
| 22:4 (n-6)     | 3.11 ± 0.53    | 2.61 ± 0.39     | 1.97 ± 0.19** #     |
| 22:5(n-6)      | 1.37 ± 0.22    | 0.73 ± 0.28     | 0.10 ± 0.05** ##    |
| 22:5 (n-3)     | 0.32 ± 0.19    | 0.40 ± 0.20     | 1.78 ± 0.55** ##    |
| 22:6 (n-3)     | 19.27 ± 1.45   | 18.79 ± 0.52    | 32.95 ± 3.63** ###  |
| 16:0 DMA       | 0.22 ± 0.16    | 0.13 ± 0.07     | 0.40 ± 0.14         |
| 18:0 DMA       | 0.04 ± 0.04    | 0.08 ± 0.05     | 0.26 ± 0.12         |
| 18:1 DMA       | 0.07 ± 0.02    | 0.06 ± 0.03     | 0.13 ± 0.15         |
| 20:5+22:5+22:6 | 19.73 ± 1.34   | 19.65 ± 0.80    | 39.81 ± 4.67*** ### |

DMA: dimethylacetal

\*P< 0.05, \*\*p<0.01; \*\*\*p<0.001; \*\*\*\*p<0.0001 compared to control (ANOVA)

# p<0.05; ## p<0.01; ### p<0.001; #### p<0.0001, compared to free EPA (ANOVA)



**Supplemental Figure S1.**

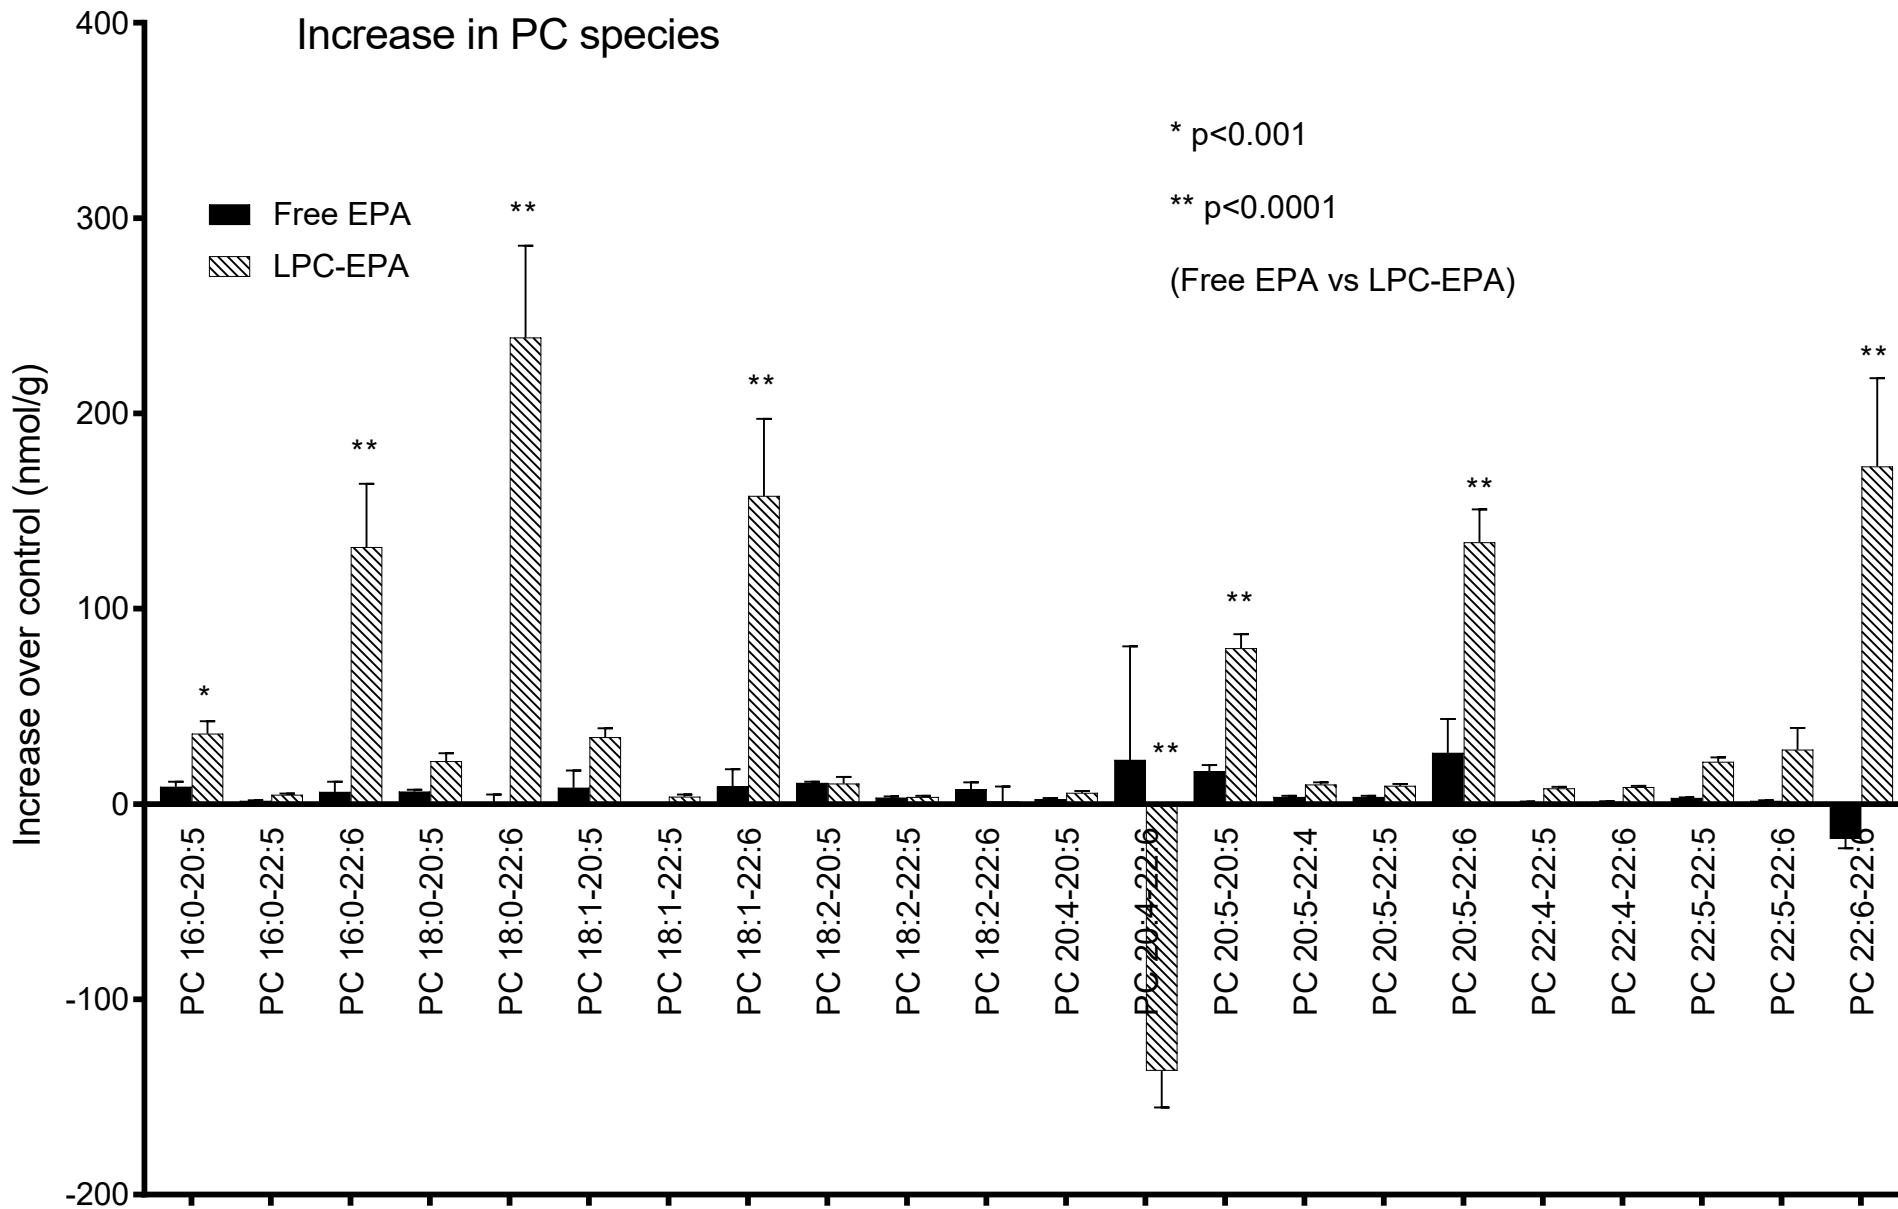

The molecular species composition of omega 3 fatty acid-containing diacyl PCs was determined by LC/MS/MS, as described in the text. The increase of each species above the No-EPA control mean was then calculated. The results shown are mean +/- SD of 6 samples. Statistical significance determined by unpaired t test with Welch's correction (Graphpad Prism)

**Supplemental Figure S2**

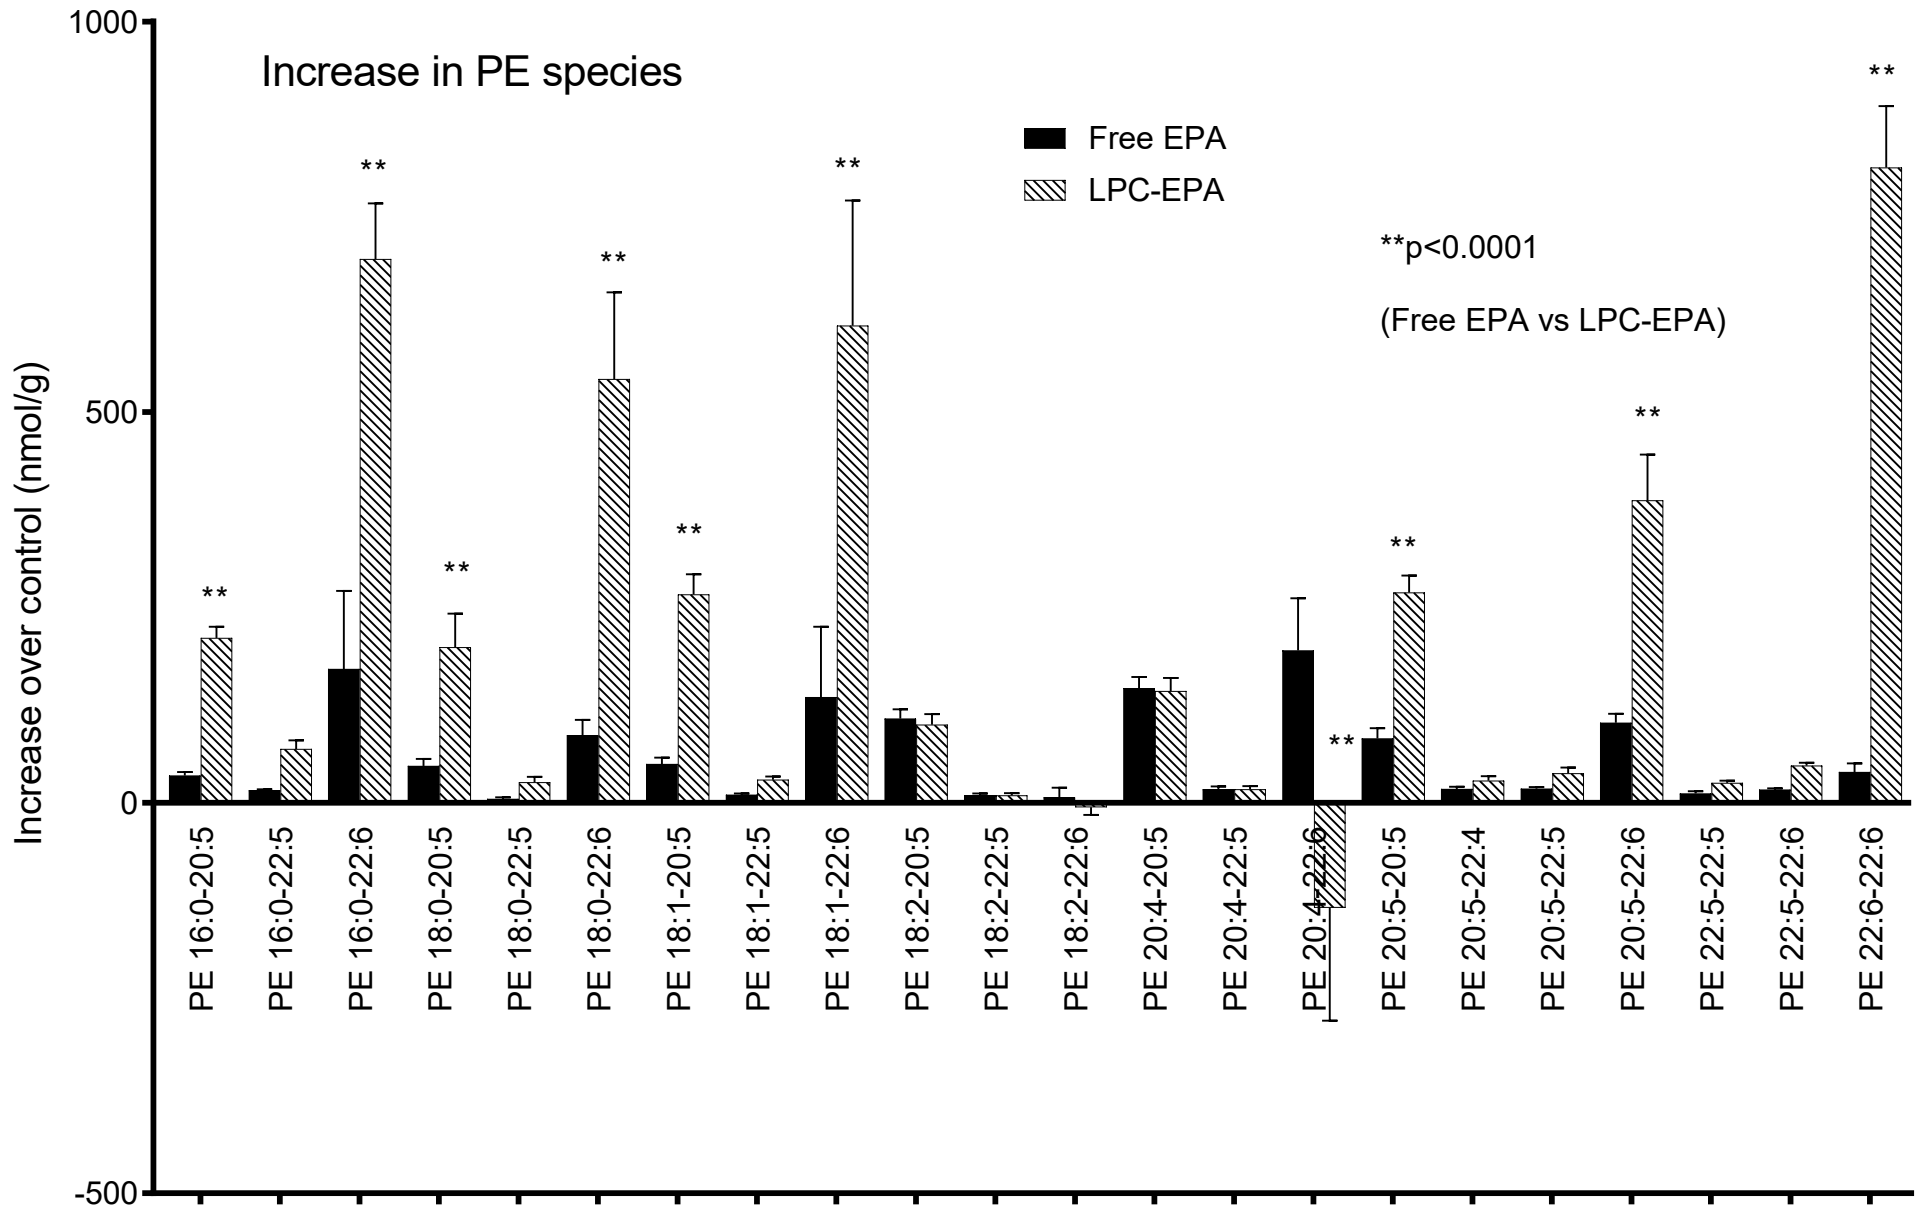

The molecular species composition of omega 3 fatty acid-containing diacyl PEs was determined by LC/MS/MS, as described in the text. The increase of each species above the mean of No-EPA controls was then calculated. The results shown are mean +/- SD of 6 samples. Statistical significance determined by unpaired t test with Welch's correction (Graphpad Prism)

### Supplemental Figure S3

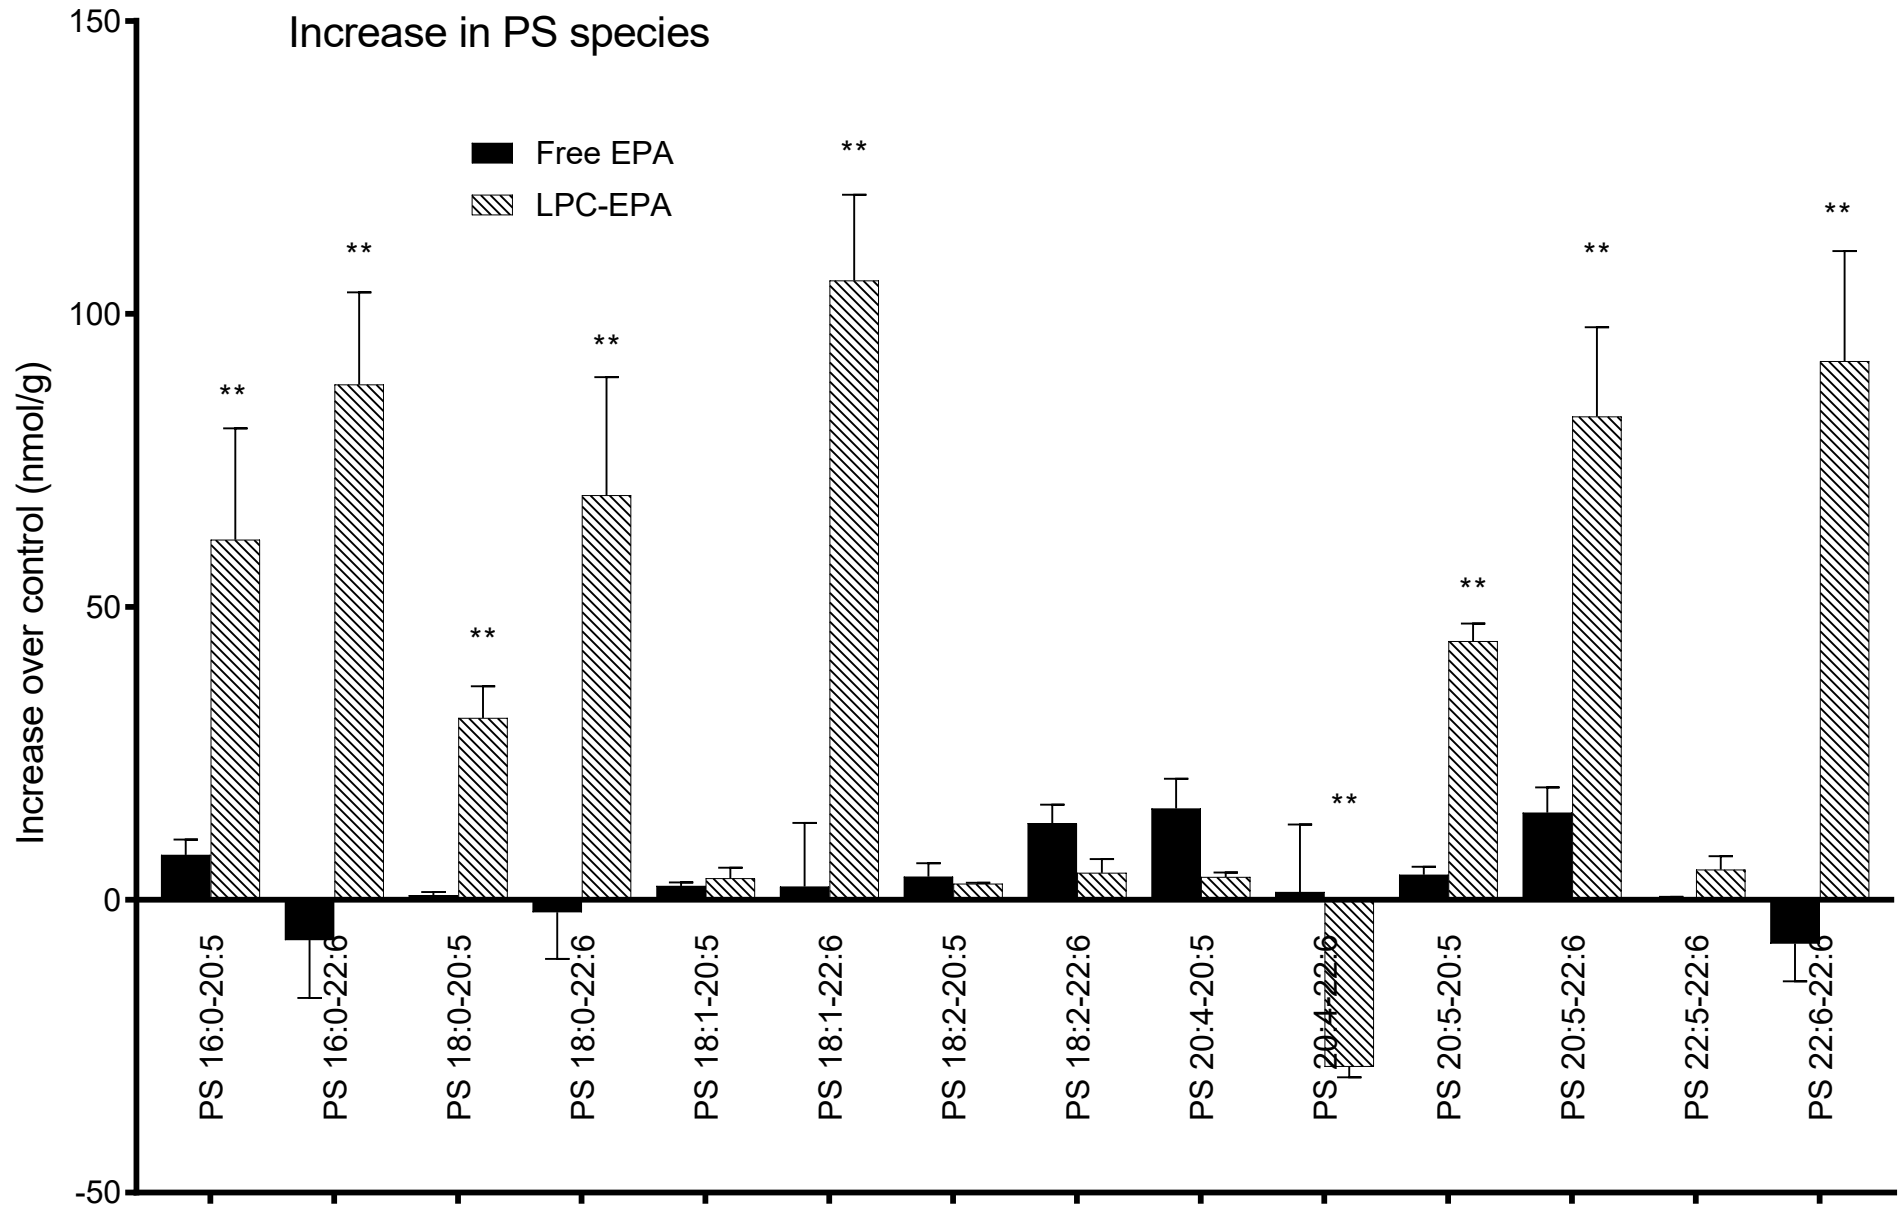

The molecular species composition of omega 3 fatty acid-containing diacyl PS was determined by LC/MS/MS, as described in the text. The increase of each species above the mean of No-EPA controls was then calculated. The results shown are mean  $\pm$  SD of 6 samples. Statistical significance determined by unpaired t test with Welch's correction (Graphpad Prism)

**Supplemental Figure S4**

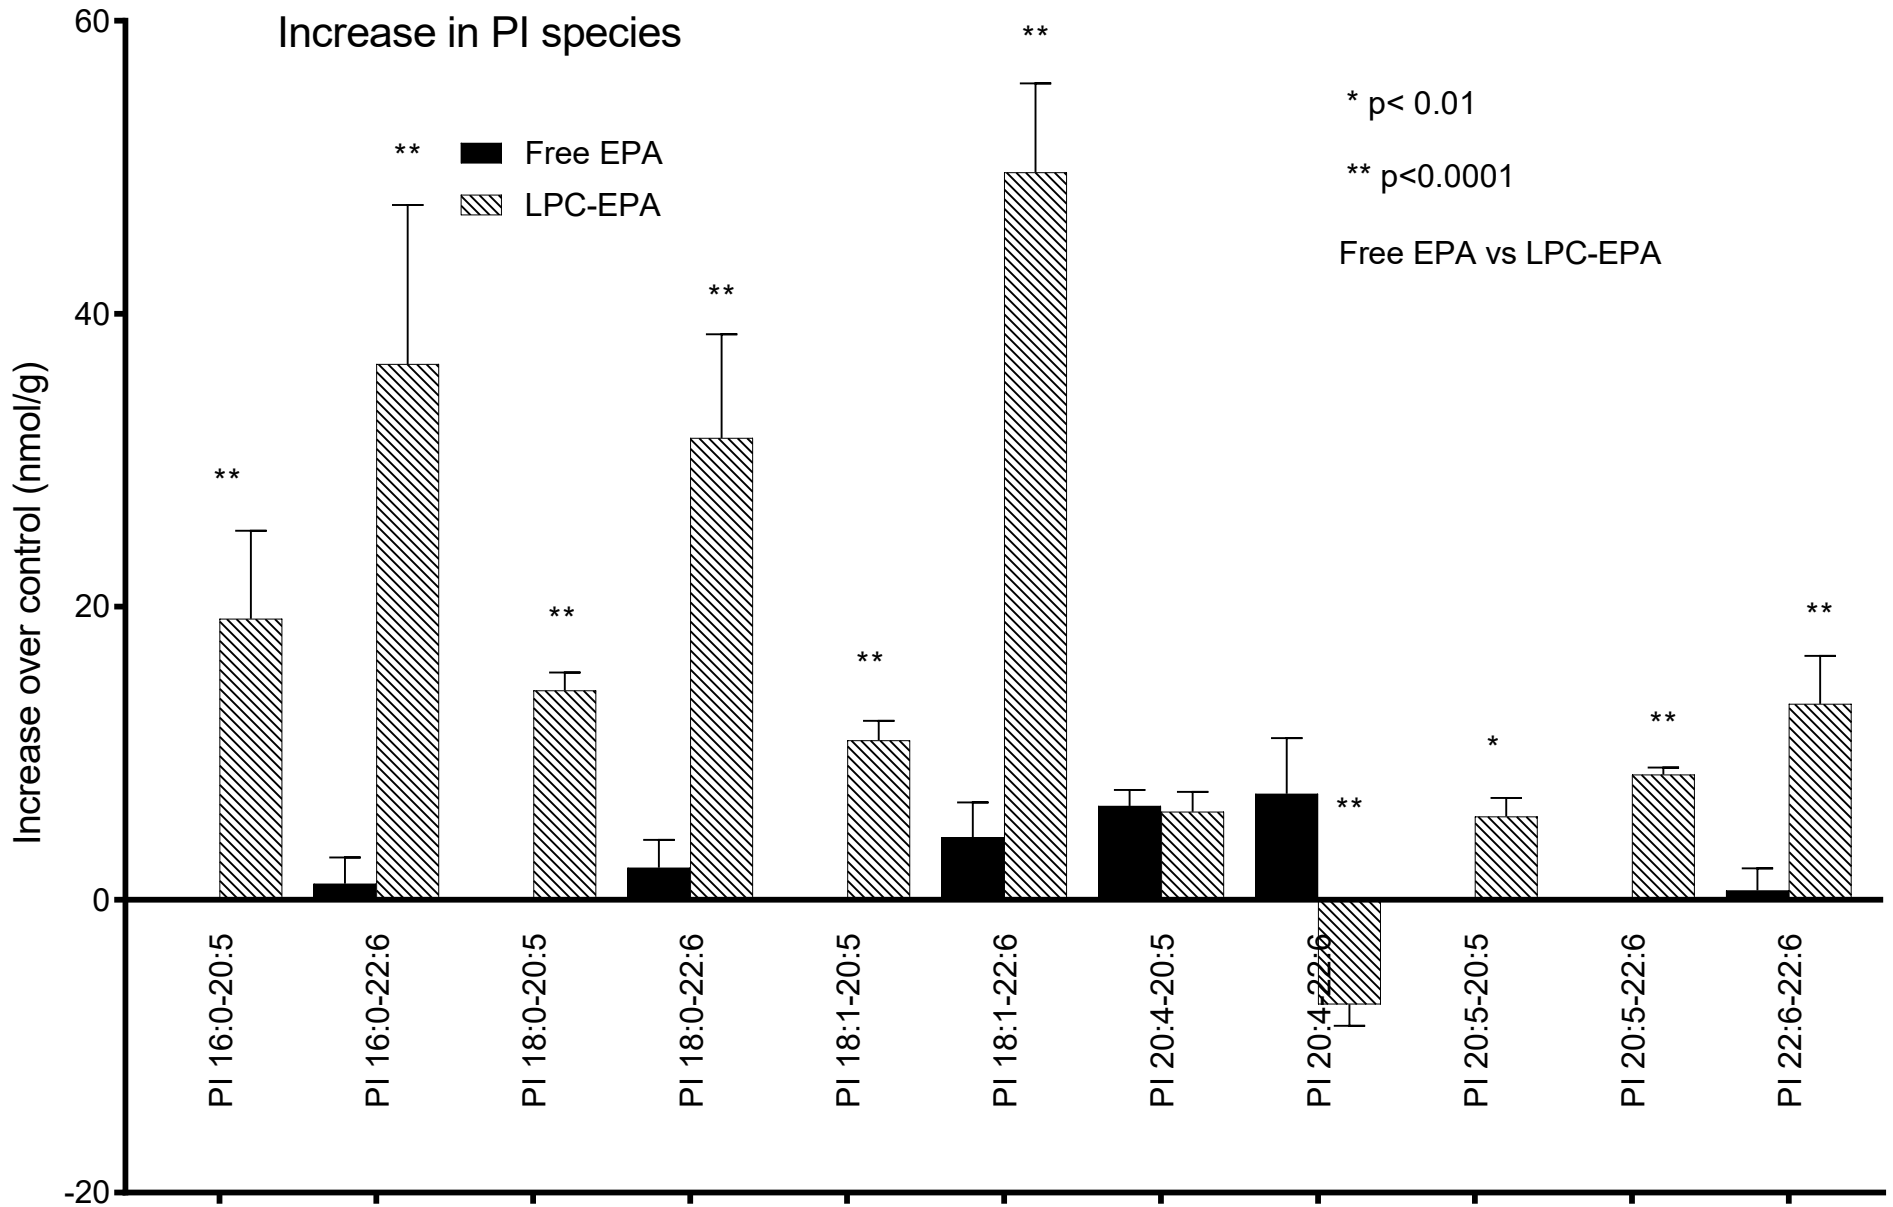

The molecular species composition of omega 3 fatty acid-containing diacyl PIs was determined by LC/MS/MS, as described in the text. The increase of each species above the mean of No-EPA controls was then calculated. The results shown are mean +/- SD of 6 samples. Statistical significance determined by unpaired t test with Welch's correction (Graphpad Prism)
